# Supplementary material for: Thiophene-substituted phenothiazine-based photosensitisers for radical and cationic photopolymerization reactions under visible laser beams (405 and 455 nm)
Source: Royal Society of Chemistry journal article supplement (doi:10.1039/c6py01095d), 2016-01-01
Supplement: c6py01095d1.pdf [file c6py01095d1.pdf]

## Supporting Information

### **Thiophene-Substituted Phenothiazine-Based Photosensitisers for Radical and Cationic Photopolymerizations Reaction under Visible Laser Beams (405 and 455nm)**

Pengjie Chao<sup>a, b, c</sup>, Renquan Gu<sup>b</sup>, Xiaoyu Ma<sup>b</sup>, Tao Wang<sup>\*a, b</sup> and Yuming Zhao<sup>d</sup>

<sup>a</sup>*State Key Laboratory of Chemical Resource Engineering, College of Science, Beijing University  
of Chemical Technology, Beijing 100029, China*

<sup>b</sup>*Department of Organic Chemistry, College of Science, Beijing University of Chemical  
Technology, Beijing 100029, PR China*

<sup>c</sup>*Department of Chemistry, South University of Science and Technology of China(SUSTC), No.  
1088, Xueyuan Road, Shenzhen, Guangdong, 518055, China*

<sup>d</sup>*Department of Chemistry, Memorial University St. John's, NL, Canada A1B 3X7*

**\*corresponding E-mail: wangtwj2000@163.com**  
**Telephone: 010-64435350**

### 1. Synthesis of EPTZ[1, 2]

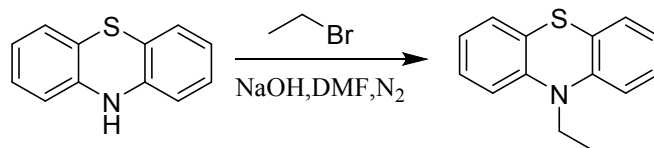

Yield: 95.15%;  $^1\text{H}$  NMR (400 MHz,  $\text{CDCl}_3$ )  $\delta$  7.20 (dd,  $J = 12.5, 6.5$  Hz, 4H), 6.93 (dd,  $J = 18.4, 7.7$  Hz, 4H), 3.96 (q,  $J = 6.78$  Hz, 2H), 1.45 (t,  $J = 7.03$  Hz, 3H);  $^{13}\text{C}$  NMR (101 MHz,  $\text{CDCl}_3$ )  $\delta$  145.03, 127.39, 127.24, 124.49, 122.35, 115.15, 41.78, 13.07.

### 2. Synthesis of HPTZ [3]

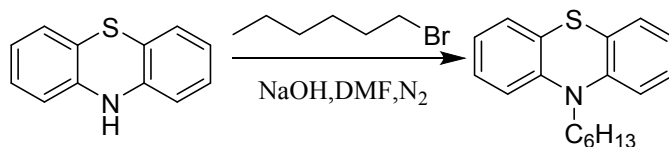

Yield: 82.33%;  $^1\text{H}$  NMR (400 MHz,  $\text{CDCl}_3$ )  $\delta$  7.19 (t,  $J = 7.58$  Hz, 1H), 6.92 (dd,  $J = 18.7, 7.7$  Hz, 1H), 3.87 (t,  $J = 6.8$ , 2H), 1.83 (m, 2H), 1.50–1.42 (m, 2H), 1.36–1.30 (m, 4H), 0.90 (t,  $J = 7.0$  Hz, 3H);  $^{13}\text{C}$  NMR (101 MHz,  $\text{CDCl}_3$ )  $\delta$  145.29, 127.42, 127.17, 124.93, 122.35, 115.44, 60.40, 47.50, 31.48, 26.69, 22.60, 14.00.

### 3. Synthesis of MBrEPTZ [2, 4, 5]

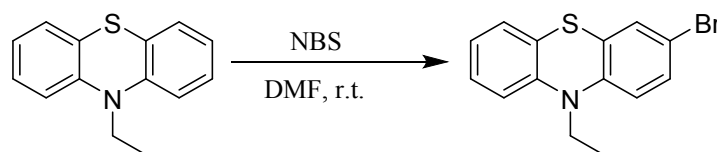

Yield: 74.37%;  $^1\text{H}$  NMR (400 MHz,  $\text{CDCl}_3$ )  $\delta$  7.26 (d,  $J = 7.2$  Hz, 2H), 7.17 (t,  $J = 7.75$  Hz, 1H), 7.13 (d,  $J = 7.6$  Hz, 1H), 6.99 – 6.90 (m, 1H), 6.87 (d,  $J = 8.08$  Hz, 1H), 6.72 (d,  $J = 9.07$  Hz, 1H), 3.87 (q,  $J = 7.6$ , 2H), 1.42 (t,  $J = 7.0$  Hz, 3H);  $^{13}\text{C}$  NMR (101 MHz,  $\text{CDCl}_3$ )  $\delta$  130.16, 129.85, 129.67, 129.55, 127.49, 126.84, 123.80, 122.67, 116.34, 116.22, 115.24, 114.45, 41.89, 12.91.

### 4. Synthesis of DBrEPTZ[6]

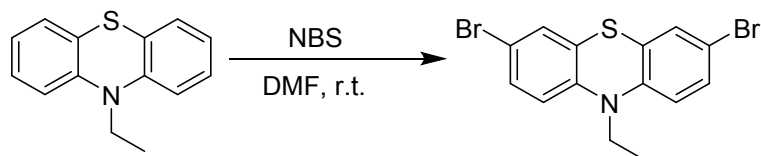

Yield: 68.76%;  $^1\text{H NMR}$  (400 MHz,  $\text{CDCl}_3$ )  $\delta$  7.25 (d,  $J = 2.3$  Hz, 1H), 7.23 (d,  $J = 7.3$  Hz, 1H), 7.21 (d,  $J = 7.2$  Hz, 2H), 6.69 (d,  $J = 8.6$  Hz, 2H), 3.84 (q,  $J = 6.85$  Hz, 2H), 1.39 (t,  $J = 6.9$  Hz, 3H);  $^{13}\text{C NMR}$  (101 MHz,  $\text{CDCl}_3$ )  $\delta$  143.76, 130.15, 129.62, 125.94, 116.34, 114.76, 42.05, 12.80.

### 5. Synthesis of MBrHPTZ [7]

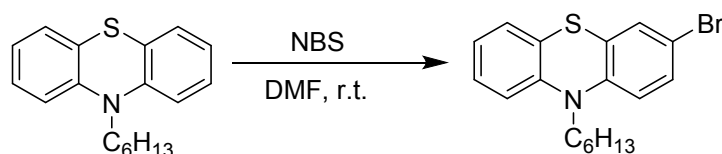

Yield: 80.11%.  $^1\text{H NMR}$  (400 MHz,  $\text{CDCl}_3$ )  $\delta$  7.26 (dq,  $J = 4.0, 2.2$  Hz, 2H), 7.16 (ddd,  $J = 9.0, 8.1, 1.3$  Hz, 2H), 6.92 (dd,  $J = 29.0, 7.5$  Hz, 2H), 6.71 (dd,  $J = 8.2, 4.9$  Hz, 1H), 3.79 (q,  $J = 6.9$  Hz, 2H), 1.84–1.74 (m, 2H), 1.49–1.40 (m, 2H), 1.36–1.29 (m, 4H), 0.90 (t,  $J = 7.0$  Hz, 3H);  $^{13}\text{C NMR}$  (101 MHz,  $\text{CDCl}_3$ )  $\delta$  130.12, 129.83, 129.73, 129.63, 127.45, 127.30, 126.48, 122.68, 116.67, 116.56, 115.57, 114.76, 47.64, 31.41, 26.59, 26.51, 22.59, 13.99.

### 6. Synthesis of DBrHPTZ

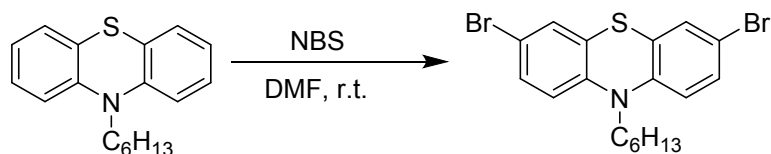

Yield: 61.53%;  $^1\text{H NMR}$  (400 MHz,  $\text{CDCl}_3$ )  $\delta$  7.27 (d,  $J = 7.3$  Hz, 1H), 7.24 (t,  $J = 7.6$  Hz, 3H), 6.70 (d,  $J = 8.4$  Hz, 2H), 3.78 (q,  $J = 6.9$  Hz, 2H), 1.76 (m, 2H), 1.41 (m, 2H), 1.33–1.28 (m, 4H), 0.89 (t,  $J = 6.9$  Hz, 3H);  $^{13}\text{C NMR}$  (101 MHz,  $\text{CDCl}_3$ )  $\delta$  144.13, 130.12, 129.71, 126.49, 116.67, 114.78, 47.62, 31.38, 26.66, 26.50, 22.57, 13.98.

### 7. Synthesis of MBrFEPTZ [8, 9]

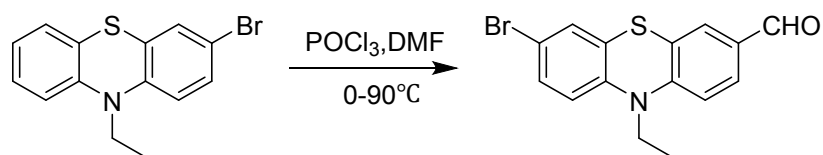

Yield: 79.65%.  $^1\text{H}$  NMR (400 MHz,  $\text{CDCl}_3$ )  $\delta$  9.82 (s, 1H), 7.66 (dd,  $J = 8.4, 1.9$  Hz, 1H), 7.58 (d,  $J = 7.9$  Hz, 1H), 7.29–7.25 (m, 1H), 7.23 (d,  $J = 8.2$  Hz, 1H), 6.93 (d,  $J = 8.5$  Hz, 1H), 6.75 (d,  $J = 8.7$  Hz, 1H), 3.96 (q,  $J = 7.0$  Hz, 2H), 1.45 (t,  $J = 7.0$  Hz, 3H);  $^{13}\text{C}$  NMR (101 MHz,  $\text{CDCl}_3$ )  $\delta$  189.88, 149.85, 142.29, 131.26, 130.36, 130.26, 129.70, 128.29, 125.60, 123.82, 116.68, 115.81, 114.58, 42.59, 12.73.

### 8. Synthesis of MBrFHPTZ

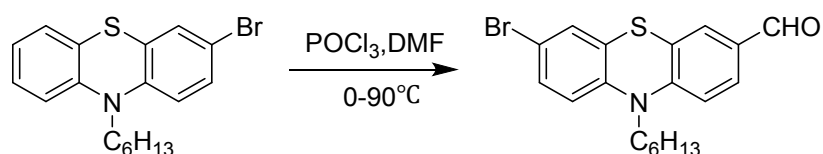

Yield: 77.41%.  $^1\text{H}$  NMR (400 MHz,  $\text{CDCl}_3$ )  $\delta$  9.82 (s, 1H), 7.67 (dd,  $J = 8.4, 1.9$  Hz, 1H), 7.59 (d,  $J = 7.8$  Hz, 1H), 7.29–7.24 (m, 2H), 6.92 (d,  $J = 8.4$  Hz, 1H), 6.74 (d,  $J = 8.6$  Hz, 1H), 3.89–3.84 (m, 2H), 1.81 (m, 7.4 Hz, 2H), 1.44 (m, 2H), 1.37–1.28 (m, 4H), 0.90 (t,  $J = 7.0$ , 3H);  $^{13}\text{C}$  NMR (101 MHz,  $\text{CDCl}_3$ )  $\delta$  189.90, 150.34, 142.67, 131.30, 130.24, 129.80, 128.46, 127.56, 126.17, 124.41, 117.09, 115.81, 115.00, 48.10, 31.34, 26.62, 26.44, 22.55, 13.96.

**Table S1.** Optical absorption properties of the dyes ThPTZs ( $5 \times 10^{-5}$  mol/L)

| Dyes                 | $\lambda_{\max}$<br>(nm) | $\epsilon_{\max} \times 10^4$<br>( $M^{-1} \cdot cm^{-1}$ ) | $\lambda_{\max}$<br>(nm) | $\epsilon_{\max} \times 10^4$<br>( $M^{-1} \cdot cm^{-1}$ ) | $\epsilon_{\max 2} \times 10^3$<br>( $M^{-1} \cdot cm^{-1}$ )(405nm) | $\epsilon_{\max 2} \times 10^3$<br>( $M^{-1} \cdot cm^{-1}$ )(455 nm) |
|----------------------|--------------------------|-------------------------------------------------------------|--------------------------|-------------------------------------------------------------|----------------------------------------------------------------------|-----------------------------------------------------------------------|
| ThEPTZ               | 307.7                    | 3.18                                                        | 363.3                    | 0.87                                                        | 3.37                                                                 | 0.33                                                                  |
| Th <sub>2</sub> EPTZ | 317.6                    | 4.69                                                        | 375.4                    | 1.26                                                        | 8.87                                                                 | 1.86                                                                  |
| ThFEPTZ              | 327.7                    | 9.93                                                        | 435.4                    | 1.02                                                        | 6.93                                                                 | 9.19                                                                  |
| ThHPTZ               | 308.3                    | 2.82                                                        | 363.4                    | 0.76                                                        | 2.88                                                                 | 0.33                                                                  |
| Th <sub>2</sub> HPTZ | 317.5                    | 4.02                                                        | 375.4                    | 1.11                                                        | 7.58                                                                 | 1.51                                                                  |
| ThFHPTZ              | 327.4                    | 3.54                                                        | 435.4                    | 0.94                                                        | 6.37                                                                 | 8.36                                                                  |

**Table S2.** Epoxy conversions of E51 in a laminate obtained under air upon exposure to different visible laser diodes for 300 s and final conversion (Cf) in the presence of ThPTZs/ION (0.1%: 3.0%, w/w); And EPTZ/ION (0.1%: 3.0%, w/w) as references.

| ThPTZs/ION               | Epoxy Conversion (%) for E51 |      |        |      |
|--------------------------|------------------------------|------|--------|------|
|                          | 405 nm                       |      | 455 nm |      |
|                          | 300 s                        | Cf   | 300 s  | Cf   |
| ThEPTZ/ION               | 58.2                         | 62.3 | 62.8   | 64.1 |
| ThHPTZ/ION               | 56.5                         | 60.8 | 64.4   | 65.6 |
| Th <sub>2</sub> EPTZ/ION | 70.5                         | 72.2 | 68.5   | 70.2 |
| Th <sub>2</sub> HPTZ/ION | 67.5                         | 69.4 | 69.2   | 70.9 |
| ThFEPTZ/ION              | 67.1                         | 68.7 | 71.4   | 72.8 |
| ThFHPTZ/ION              | 65.8                         | 67.3 | 72.7   | 74.7 |
| EPTZ/ION                 | 14.7                         | 20.3 | 15.9   | 21.4 |

**Table S3.** Double bond conversions of TPGDA in a laminate obtained under air upon exposure to different visible laser diodes for 100 and 200 s in the presence of ThPTZs/ION (0.1%/1.0%, w/w); EPTZ/ION (0.1%/1.0%, w/w), CQ/TEA (0.1%/10%, w/w) and ION as references.

| ThPTZs/ION               | Double Conversion (%) for TPGDA |       |        |       |
|--------------------------|---------------------------------|-------|--------|-------|
|                          | 405 nm                          |       | 455 nm |       |
|                          | 100 s                           | 200 s | 100 s  | 200 s |
| ThEPTZ/ION               | 44.7                            | 62.5  | 39.4   | 73.6  |
| ThHPTZ/ION               | 39.9                            | 57.8  | 32.4   | 71.8  |
| Th <sub>2</sub> EPTZ/ION | 74.9                            | 80.7  | 79.6   | 79.8  |
| Th <sub>2</sub> HPTZ/ION | 69.8                            | 80.0  | 79.9   | 80.5  |
| ThFEPTZ/ION              | 76.1                            | 77.1  | 82.1   | 82.0  |
| ThFHPTZ/ION              | 78.2                            | 78.9  | 83.5   | 83.5  |
| EPTZ/ION                 | 7.9                             | 15.4  | 11.3   | 18.8  |

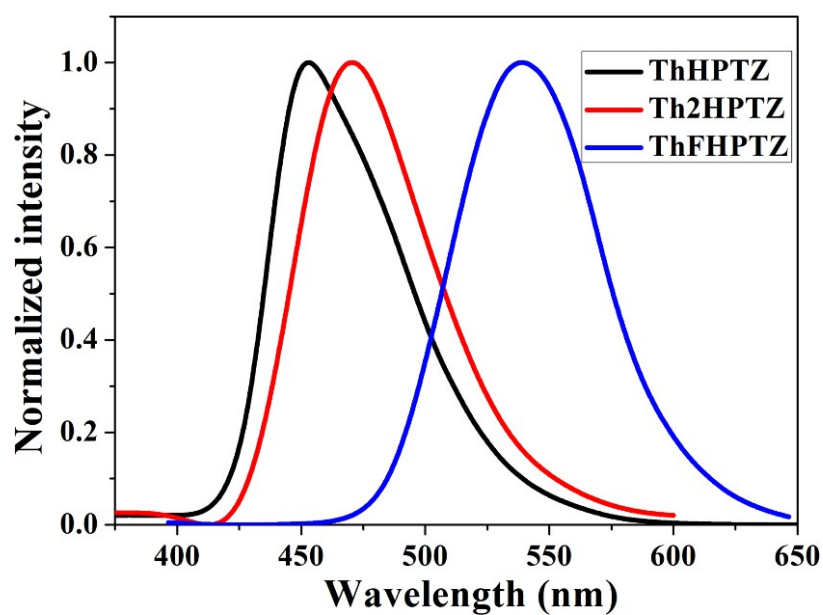

**Figure S1.** Normalized fluorescence emission spectra of the other dyes in DMF solution ( $M=5\times 10^{-5}$  mol/L).

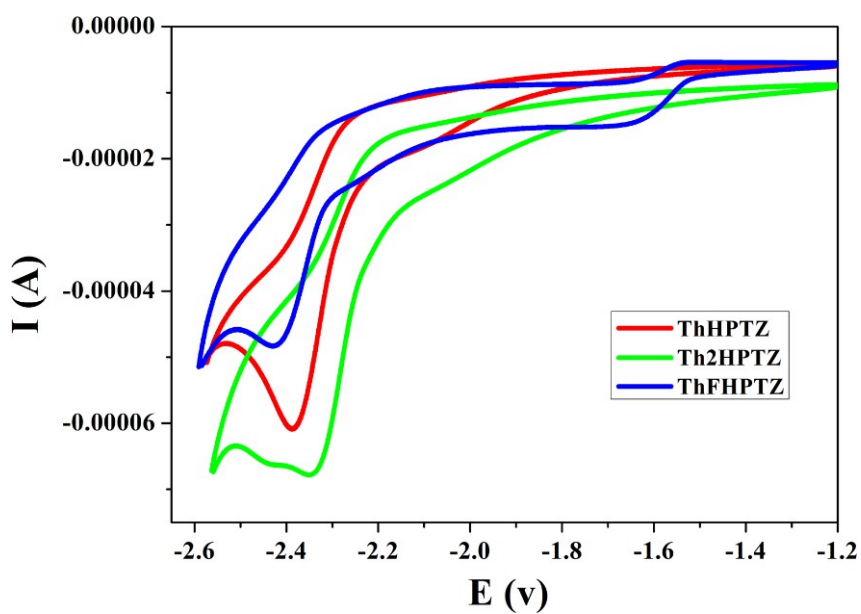

**Figure S2.** Cyclic voltammogram curves of ThHPTZ, Th2PTZ and ThFHPTZ in DCM

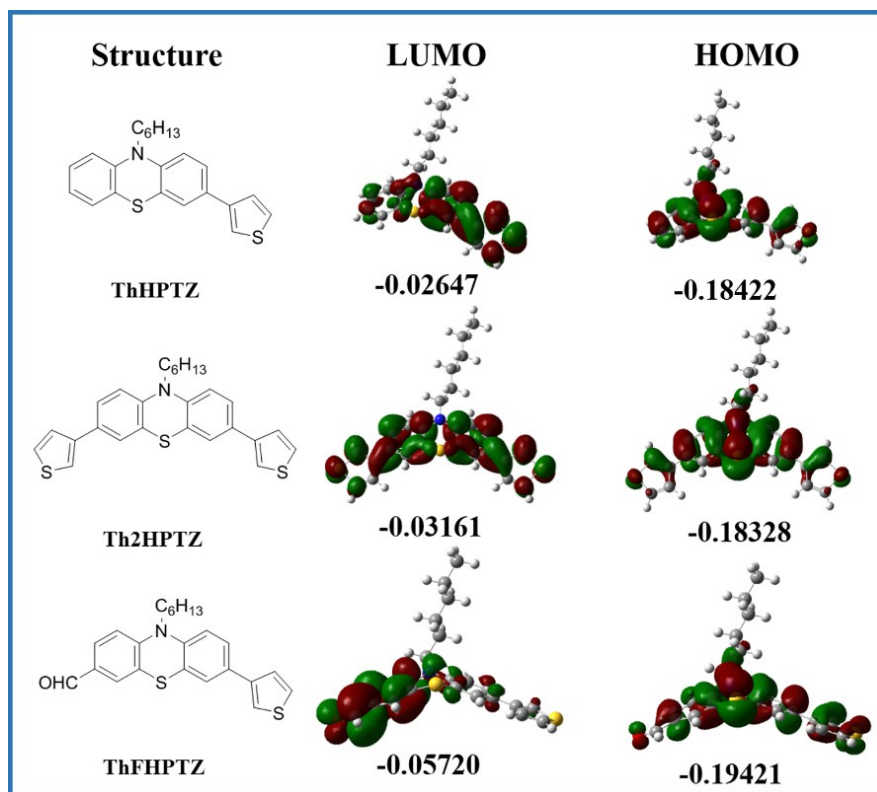

**Figure S3.** Optimized geometry, highest occupied molecular orbital (HOMO) and lowest unoccupied molecular orbital (LUMO) of ThHPTZ, Th2HPTZ and ThFHPTZ at the B3LYP/6-31G\* level.

## References

- [1] Petran A, Terec A, Bogdan E, Soran A, Lakatos E, Grosu I. Thiophene-based macrocycles via the Suzuki–Miyaura cross coupling reaction. *Tetrahedron*. 2014;70(38):6803-9.
- [2] Yun D-H, Yoo H-S, Heo S-W, Song H-J, Moon D-K, Woo J-W, et al. Synthesis and photovoltaic characterization of D/A structure compound based on N-substituted phenothiazine and benzothiadiazole. *Journal of Industrial and Engineering Chemistry*. 2013;19(2):421-6.
- [3] Kim SH, Sakong C, Chang JB, Kim B, Ko MJ, Kim DH, et al. The effect of N-

substitution and ethylthio substitution on the performance of phenothiazine donors in dye-sensitized solar cells. *Dyes and Pigments*. 2013;97(1):262-71.

[4] Tacca A, Po R, Caldararo M, Chiaberge S, Gila L, Longo L, et al. Ternary thiophene–X–thiophene semiconductor building blocks (X=fluorene, carbazole, phenothiazine): Modulating electronic properties and electropolymerization ability by tuning the X core. *Electrochimica Acta*. 2011;56(19):6638-53.

[5] Li Z, Dong Q, Li Y, Xu B, Deng M, Pei J, et al. Design and synthesis of solution processable small molecules towards high photovoltaic performance. *Journal of Materials Chemistry*. 2011;21(7):2159.

[6] Hemgesberg M, Ohlmann DM, Schmitt Y, Wolfe MR, Müller MK, Erb B, et al. Simple Access to Sol-Gel Precursors Bearing Fluorescent Aromatic Core Units. *European Journal of Organic Chemistry*. 2012;2012(11):2142-51.

[7] Li P, Tong H, Liu J, Ding J, Xie Z, Wang L. An A'–A–D–A–A' type small molecule based on 2,7-carbazole for solution-processed organic solar cells with high open-circuit voltage. *RSC Advances*. 2013;3(45):23098.

[8] Liu B, Wang R, Mi W, Li X, Yu H. Novel branched coumarin dyes for dye-sensitized solar cells: significant improvement in photovoltaic performance by simple structure modification. *Journal of Materials Chemistry*. 2012;22(30):15379.

[9] Chu H-C, Sahu D, Hsu Y-C, Padhy H, Patra D, Lin J-TS, et al. Structural planarity and conjugation effects of novel symmetrical acceptor–donor–acceptor organic sensitizers on dye-sensitized solar cells. *Dyes and Pigments*. 2012;93(1-3):1488-97.
